# Supplementary material for: Cell-Laden 3D Printed GelMA/HAp and THA Hydrogel Bioinks: Development of Osteochondral Tissue-like Bioinks
Source: MDPI journal article supplement (doi:10.3390/ma16227214), 2023-11-17
Supplement: s1 [file s1]

# Supporting Information

## Cell-Laden 3D Printed GelMA/Hap and THA Hydrogel Bioinks: Development of Osteochondral Tissue Like

**Table S1.** Primer and probe sequences for qRT- PCR.

| Gene           | Forward primer                            | Reverse primer                                 | Probe                                                  |
|----------------|-------------------------------------------|------------------------------------------------|--------------------------------------------------------|
| <i>Coll 2</i>  | 5' – GGC AAT AGC AGG TTC ACG TAC A<br>-3' | 5'- GAT AAC AGT CTT GCC CCA CTT<br>ACC -3'     | 5'- CCT GAA GGA TGG CTG CAC GAA<br>ACA TAC -3'         |
| <i>Coll 10</i> | 5'- ACG CTG AAC GAT ACC AAA TG -3'        | 5'- TGC TAT ACC TTT ACT CTT TAT GGT<br>GTA -3' | 5'- ACT ACC CAA CAC CAA GAC ACA<br>GTT CTT CAT TCC -3' |
| <i>Coll 1</i>  | 5'- CCC TGG AAA GAA TGG AGA TGA T<br>-3'  | 5'- ACT GAA ACC TCT GTG TCC CTT CA<br>-3'      | 5'- CGG GCA ATC CTC GAG CAC CCT -3'                    |
| <i>ACAN</i>    | 5'- AGT CCT CAA GCC TCC TGT ACT CA<br>-3' | 5'- CGG GAA GTG GCG GTA ACA -3'                | 5'- CCG GAA TGG AAA CGT GAA TCA<br>GAA TCA ACT -3'     |
| <i>Sox 9</i>   | 5'- TCT GGA GAC TTC TGA ACG AGA G -<br>3' | 5'- CTG GTA CTT GTA ATC CGG GTG -3'            | 5'- TCC ACG AAG GGC CGC TTC T -3'                      |
| <i>IBSP</i>    | 5'- GGC CTG TGC TTT CTC AAT G -3'         | 5'- CGT GGC CTG TAC TTA AAG ACC<br>CCA TT-3'   | 5'- ACT GCC CTG AAC TGG AAA TC-3'                      |
| <i>Runx2</i>   | 5'- AGC AAG GTT CAA CGA TCT GAG<br>AT -3' | 5'- TTT GTG AAG ACG CTT ATG GTC AA<br>-3'      | 5'-TGA AAC TCT TGC CTC GTC CAC TCC<br>G-3'             |
| <i>RPLP0</i>   | 5'- TGG GCA AGA ACA CCA TGA TG-3'         | 5'- CGG ATA TGA GGC AGC AGT TTC-3'             | 5'- AGG GCA CCT GGA AAA CAA CCC<br>AGC -3'             |

**Table S2.** List of assays on demand used for qRT-PCR.

| Gene       | Assay ID      |
|------------|---------------|
| Human ALPL | Hs01029144_m1 |

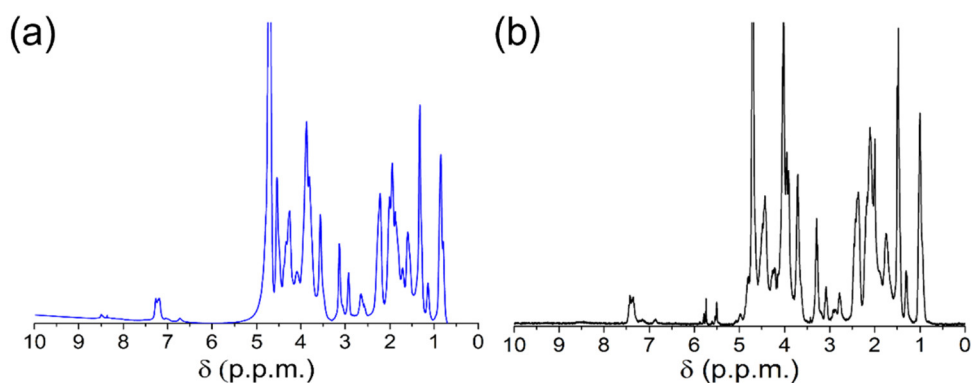

**Figure S1.** H-NMR spectra of a) Gelatin and b) GelMA.

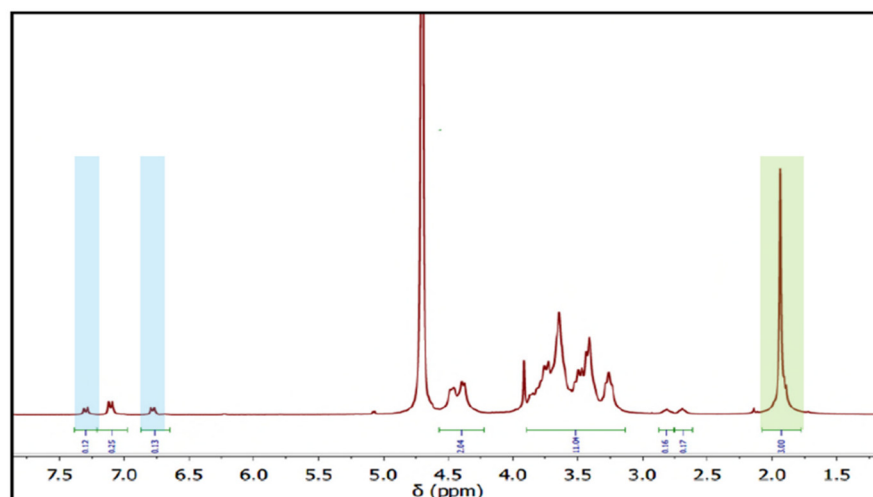

**Figure S2.** H-NMR spectrum of THA. The peak around 1.9 ppm, marked in green, represents 3 protons, and the peaks around 6.8 and 7.3 ppm are marked in blue. Each represents two protons caused by tyramine functionalization of HA (280 kDa).

**Table S3.** The concentration of chemical elements in nHA besides Ca and P.

| Element | Concentration          |
|---------|------------------------|
| Mg      | $0.038 \pm 0.004$ g/kg |
| Sr      | $124 \pm 12$ mg/kg     |
| Zn      | $3.55 \pm 0.36$ mg/kg  |
| K       | $< 0.02$ g/kg          |
| Na      | $< 0.02$ g/kg          |

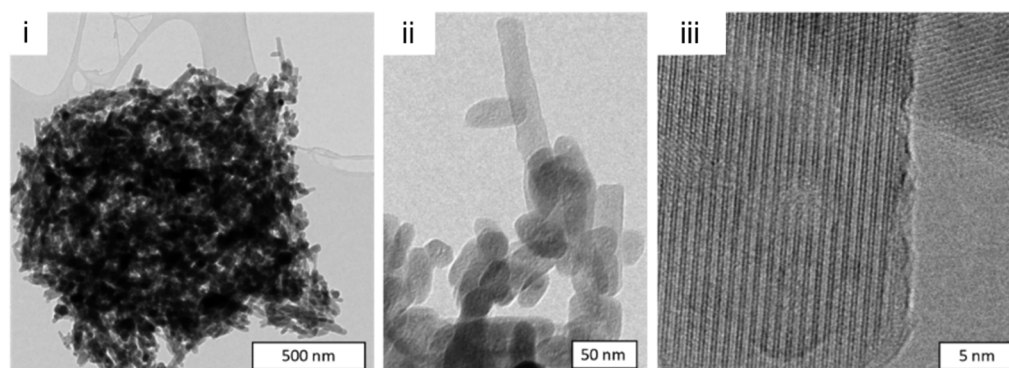

**Figure S3.** TEM images of spray-dried nHA: (i) view of one spray-dried nHA sphere, (ii) close-up of nHA rounded particles, (iii) high-resolution TEM image of nHA crystallographic planes.

**Table S4.** Characteristics of nHA synthesized by wet precipitation technology.

|                                            |                                   |
|--------------------------------------------|-----------------------------------|
| Ca/P molar ratio                           | 1.67 (stoichiometric <u>nHA</u> ) |
| Specific surface area                      | $83 \pm 8$ m <sup>2</sup> /g      |
| Particle shape                             | Needle like                       |
| Length x width of <u>nHA</u> particles     | $81 \pm 38 \times 25 \pm 4$ nm    |
| Size of the spray-dried <u>nHA</u> spheres | $4 \pm 2$ <u>μm</u>               |

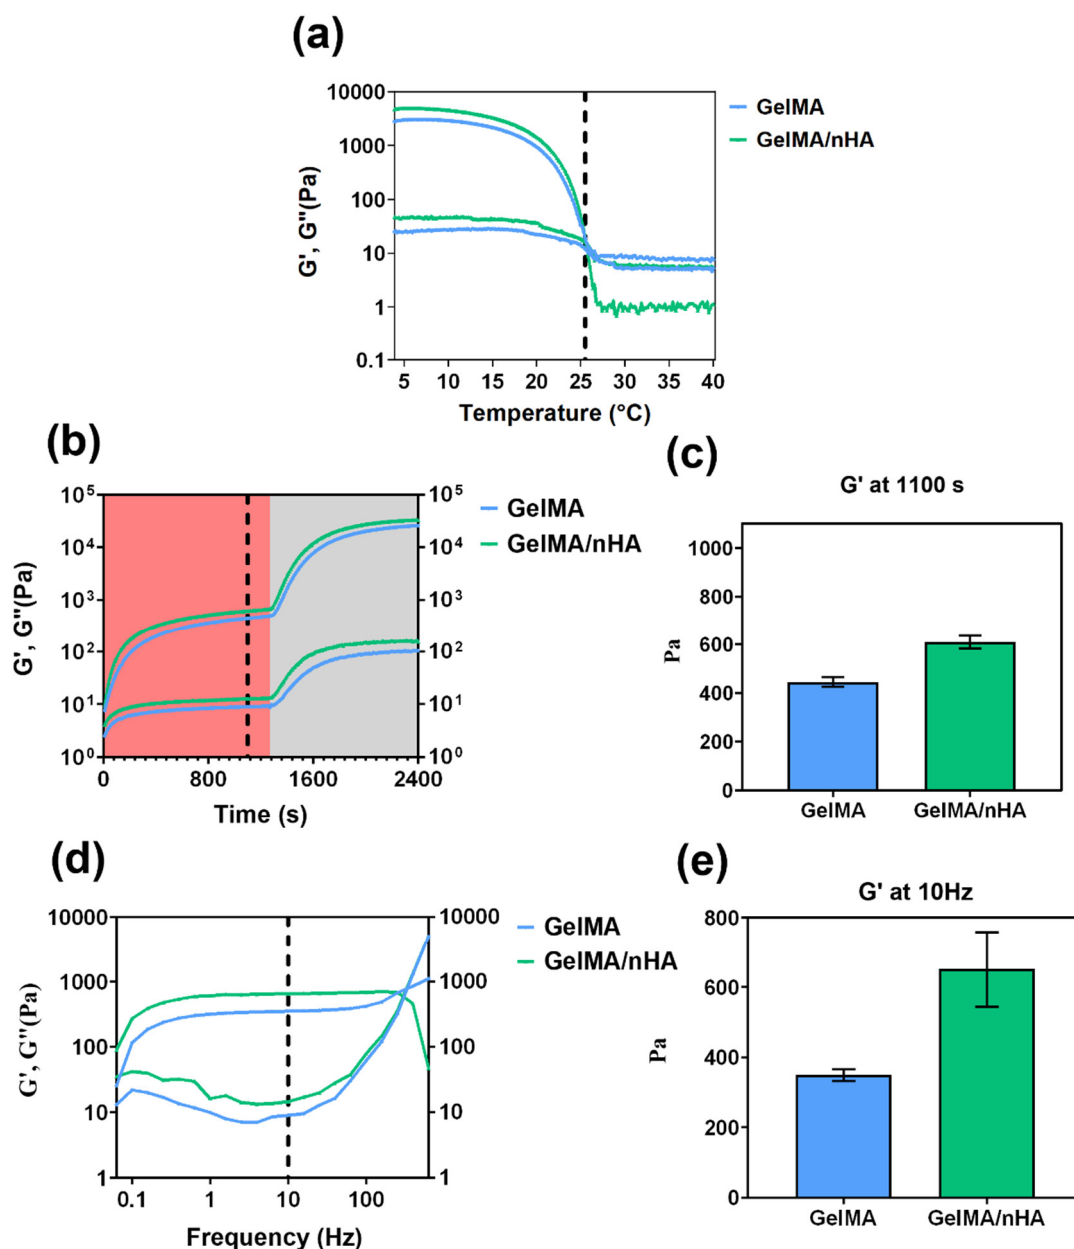

**Figure S4.** Rheological Properties of the GelMA-based hydrogel. a) Variation in dynamic storage modulus  $G'$  and loss modulus  $G''$  as a function of temperature in a temperature sweep test of GelMA and GelMA/nHA 1% hydrogels, where the cross-over points between the gel and sol state ( $G' = G''$ ) represent the gel-sol transition temperature marked by a vertical dashed line at 25  $^{\circ}\text{C}$ . All measurements were done in triplicate ( $n=3$ ); b) time sweep measurements, where the red shaded region indicates was taken at 20  $^{\circ}\text{C}$ , and the grey shaded region indicates the time when UV light was turned on to allow effective crosslinking of GelMA in the presence of Irgacure 2595 and c) storage modulus ( $G'$ ) value extracted at a time point of 1100 s. Here average of  $n=3 \pm \text{SD}$  is shown; d) frequency sweep and e) storage modulus ( $G'$ ) value extracted at 10 Hz visualized in columns for easier identification of differences. Here average of  $n=3 \pm \text{SD}$  is shown.
